1 **Highly diverse and unknown viruses may enhance Antarctic endoliths'**  
2 **adaptability**

3  
4  
5 Cassandra L. Ettinger<sup>a,\*</sup>, Morgan Saunders<sup>b,c</sup>, Laura Selbmann<sup>d</sup>, Manuel Delgado-Baquerizo<sup>e,f</sup>,  
6 Claudio Donati<sup>g</sup>, Davide Albanese<sup>g</sup>, Simon Roux<sup>h</sup>, Susannah Tringe<sup>h</sup>, Christa Pennacchio<sup>h</sup>, Tijana  
7 G. del Rio<sup>h</sup>, Jason E. Stajich<sup>a,i</sup>, Claudia Coleine<sup>a,d,e,\*</sup>

8  
9  
10 <sup>a</sup>*Department of Microbiology and Plant Pathology, University of California, Riverside, Riverside,*  
11 *California, USA.*

12  
13 <sup>b</sup>*Department of Biological Sciences, California State Polytechnic University, Pomona, Pomona,*  
14 *California, USA.*

15  
16 <sup>c</sup>*The University of Arizona, Tucson, Arizona, USA.*

17  
18 <sup>d</sup>*Department of Ecological and Biological Sciences, University of Tuscia, Italy, Viterbo, Italy.*

19  
20 <sup>e</sup>*Laboratorio de Biodiversidad y Funcionamiento Ecosistémico. Instituto de Recursos Naturales y*  
21 *Agrobiología de Sevilla (IRNAS), CSIC, Av. Reina Mercedes 10, E-41012, Sevilla, Spain*

22  
23 <sup>f</sup>*Unidad Asociada CSIC-UPO (BioFun). Universidad Pablo de Olavide, 41013 Sevilla, Spain*

24  
25 <sup>g</sup>*Research and Innovation Centre, Fondazione Edmund Mach, Via E. Mach 1, 38098, San Michele*  
26 *all'Adige, Italy*

27  
28 <sup>h</sup>*Department of Energy Joint Genome Institute, Lawrence Berkeley National Laboratory, One*  
29 *Cyclotron Road, Berkeley, CA, 94720, USA*

30  
31 <sup>i</sup>*Institute for Integrative Genome Biology, University of California, Riverside, Riverside, CA, USA.*

32  
33  
34 **Correspondence to:** [cassande@ucr.edu](mailto:cassande@ucr.edu), [coleine@unitus.it](mailto:coleine@unitus.it)

35  
36  
37  
38  
39  
40  
41  
42  
43

44 **Abstract**

45  
46 Rock-dwelling microorganisms are key players in ecosystem functioning of Antarctic ice free-  
47 areas. Yet, little is known about their diversity and ecology. Here, we performed metagenomic  
48 analyses on rocks from across Antarctica comprising >75,000 viral operational taxonomic units  
49 (vOTUS). We found largely undescribed, highly diverse and spatially structured virus communities  
50 potentially influencing bacterial adaptation and biogeochemistry. This catalog lays the foundation  
51 for expanding knowledge of the virosphere in extreme environments.

52  
53  
54  
55  
56  
57  
58  
59  
60  
61  
62  
63  
64  
65  
66  
67  
68  
69  
70  
71  
72  
73  
74  
75  
76

## 77 **Main**

78  
79 Viruses are among the most prevalent entities on our planet, with the ability to infect organisms  
80 across all Domains<sup>1</sup>. Sequencing advances are reshaping understanding of viral diversity across  
81 Earth's diverse ecosystems, leading to a remarkable expansion of viral catalogs<sup>2-4</sup>. It is becoming  
82 clear that viruses play key roles in global biogeochemical cycles through the modulation of host  
83 population dynamics, and that the better-studied pathogenic viruses represent only a small  
84 fraction of the virosphere<sup>5-7</sup>. Further, through auxiliary metabolic genes (AMGs), some viruses  
85 can directly impact host metabolism to improve fitness<sup>8</sup>, including in extreme ecosystems.

86  
87 Antarctic ice-free areas include several of the most inhospitable regions on Earth, among which  
88 is the Mars counterpart: the McMurdo Dry Valleys. In these locations, where rocks represent the  
89 main substratum, active life is possible for only a few specialized microorganisms; they survive  
90 by dwelling in porous rocks, forming self-sustaining ecosystems called endolithic  
91 communities<sup>9,10</sup> are the primary life-forms present assuring the balance and functionality of these  
92 otherwise inert ecosystems. Recent studies have shed light on their biodiversity and adaptation,  
93 particularly the evolution of new and peculiar taxa spanning bacteria, fungi and archaea<sup>10-13</sup>.  
94 However, the ecology and distribution of viral diversity from these communities remain wholly  
95 unknown and, to date, viral studies have instead focused on Antarctic freshwater lakes<sup>14-16</sup>,  
96 surrounding oceans<sup>17-19</sup>, and soils<sup>20-23</sup>.

97  
98 Here, we provide a large-scale viral catalog from 191 Antarctic endolith metagenomes. We  
99 sampled 37 localities across a broad range of environmental (e.g. 4 rock typologies, different  
100 altitudes and sun exposure) and spatial conditions (i.e. Antarctic Peninsula, Northern Victoria  
101 Land, and McMurdo Dry Valleys) (Table S1; Fig. 2A). We aimed to (i) untangle viral diversity in  
102 these communities, (ii) predict AMGs and how they may drive the fitness of their hosts, and (iii)

103 explore ecological patterns (e.g., biogeography). This catalog is the first step toward  
104 understanding the role of viruses in regulating biogeochemical cycling in the coldest and driest  
105 region on Earth. This information is also critical for elucidating the role of viruses in whole  
106 community adaptation in a scenario of global warming and expanding desertification<sup>24</sup>.

107

108 Using VirSorter2<sup>25</sup>, we predicted 101,085 viral sequences. We clustered these at 95% average  
109 nucleotide identity into 76,984 viral operations taxonomic units (vOTUS)<sup>26</sup>; we further used  
110 VContact2<sup>27</sup> with INPHARED<sup>28</sup> reference genomes to cluster phage vOTUs into 7,598 viral  
111 clusters (VCs), which approximate genus-level groupings based on gene-sharing networks. To  
112 keep analysis focused on the most robust catalog, we filtered this collection using community  
113 thresholds for length, detection, and quality (See Online Methods)<sup>29-31</sup>. The final viral catalog  
114 represented 14,797 viral sequences, including 2,695 prophage, which clustered into 11,806  
115 vOTUs, of which 5,743 phage vOTUs (7,309 sequences) were successfully placed in 2,286 VCs;  
116 the final catalog was predicted to predominantly be dsDNA phage, though 15.2% of vOTUs may  
117 represent eukaryotic viruses (i.e. NCLDVs).

118

119 Our findings indicate that Antarctic rock communities host highly diverse and novel phage  
120 populations, with only 1.8% (41 out of 2,286) of the VCs including reference sequences. The  
121 remaining 98.2% were unique VCs (i.e., did not include reference genomes), and could represent  
122 novel phage genera, greatly expanding the known diversity of viruses. Of the 41 VCs that did  
123 include reference genomes, the majority were assigned to the *Caudoviricetes* class (formerly  
124 *Caudovirales* order) of tailed double-stranded DNA bacteriophage (Fig. S1). Many genomes have  
125 not yet been reclassified, leaving viral taxonomy in flux; under the new schema, most of the 41  
126 VCs are unclassified<sup>32</sup>. The majority of unique VCs are represented by viral sequences from  
127 sandstone communities (Fig. 1A), which represents an optimum substratum, in terms of rock traits

128 (e.g. porosity), for endolithic colonization<sup>33</sup>, but is also the most represented substratum in this  
129 work.

130

131 We further established host–virus linkages using NCBI BLAST against complete bacteria and  
132 archaea genomes from RefSeq, and Antarctic endolithic bacterial and archaeal metagenome-  
133 assembled genomes (MAGs) (see Online Methods)<sup>34–36</sup> to explore the potential effects of viruses  
134 on host fitness, such as host-cell reprogramming through AMGs<sup>37</sup>. While we were unable to  
135 predict hosts for the majority of vOTUS, we observed that Proteobacteria, Actinobacteriota, and  
136 Chloroflexota were the most commonly predicted host phyla (Fig. 1B), which are thought to be  
137 core members of these communities<sup>11,38,39</sup>. Using predictions against the Antarctic MAGs, we  
138 predicted hosts for an additional 16.5% of viral sequences (Fig. S2).

139

140 We then sought to improve understanding on the functional profiles of retrieved phages using  
141 DRAM-v<sup>40</sup>. Notably, this catalog, which comprises metabolic novelty (39.3% of DRAM-v predicted  
142 AMGs had no distilled classification), may complement other available resources, which have  
143 largely been limited to coverage of human-related microbiomes (e.g. Li et al.<sup>41</sup>). Within identified  
144 functions, we found putative phage AMGs related to carbon, energy and nitrogen metabolisms  
145 (Fig. 1C). Specifically, within carbohydrate metabolism, glycoside hydrolases,  
146 glycosyltransferases, and carbohydrate-binding domains predominated. Within nitrogen  
147 metabolism, methionine degradation was the most prevalent module, and within energy, the  
148 dominant modules were related to electron transport and photosynthesis. This highlights the utility  
149 to connect vOTUs to Antarctic MAGs<sup>11</sup> and to implement complementary techniques (e.g. single-  
150 cell genomics) to provide a deeper understanding of virus-bacteria dynamics. More importantly,  
151 these findings underscore the complexity of virus-driven element biogeochemical cycles in the  
152 rocks of Antarctica, which have traditionally been considered devoid of life.

153

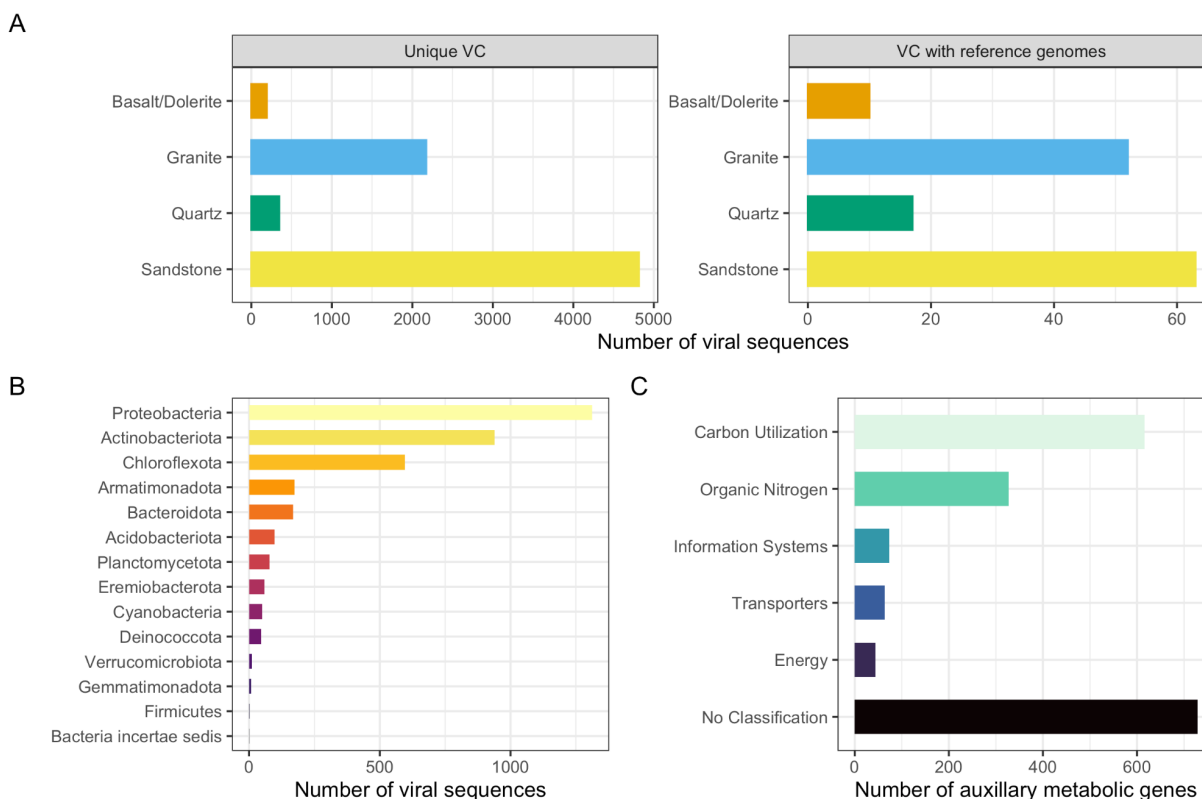

154

155 **Figure 1. Antarctica is an underappreciated source of phage novelty.** (A) Bar charts displaying the

156 number of viral sequences placed in VCs colored by rock type and divided by whether the VC is clustered

157 with reference genomes. (B) Bar chart displaying host predictions colored by predicted host phylum. (C)

158 Bar chart showing the number of predicted phage AMGs summarized by DRAM-v distilled metabolic

159 categories.

160

161 Given the geographic spread of sampling (see Online Methods and Table S1; Fig. 2A), we

162 assessed whether this catalog could be useful to answer ecological questions related to viral

163 community dynamics. While the dominant vOTUs at each site were taxonomically unclassified

164 and largely members of unique VCs and thus possible novel genera (Fig. 2B), when investigating

165 between-sample diversity (beta diversity) we observed a significant pattern related to site

166 specificity (Fig. 2C; PERMANOVA,  $p < 0.001$ ), and further detected significant distance decay

167 across sandstone communities (Fig. 2D;  $r = 0.197$ ,  $p < 0.001$ ), indicating clear latitudinal spatial

168 structuring of viral communities. In further support of this, we were able to detect only 41.0% of  
 169 vOTUs at more than one site, with 29.4% of vOTUs detected across two or more geographic  
 170 regions and only 1.45% detected across all regions. Of the vOTUs detected across all regions,  
 171 the majority were in unique VCs (66.7%) and none were in VCs with reference data. We  
 172 hypothesize that this viral spatial structuring reflects the reported dispersion limitation and local  
 173 composition and adaptation of hosts in these communities<sup>11,12</sup>. Similar spatial structuring has also  
 174 been observed in grassland soil viromes, purportedly as a result of local assembly dynamics<sup>42,43</sup>.  
 175

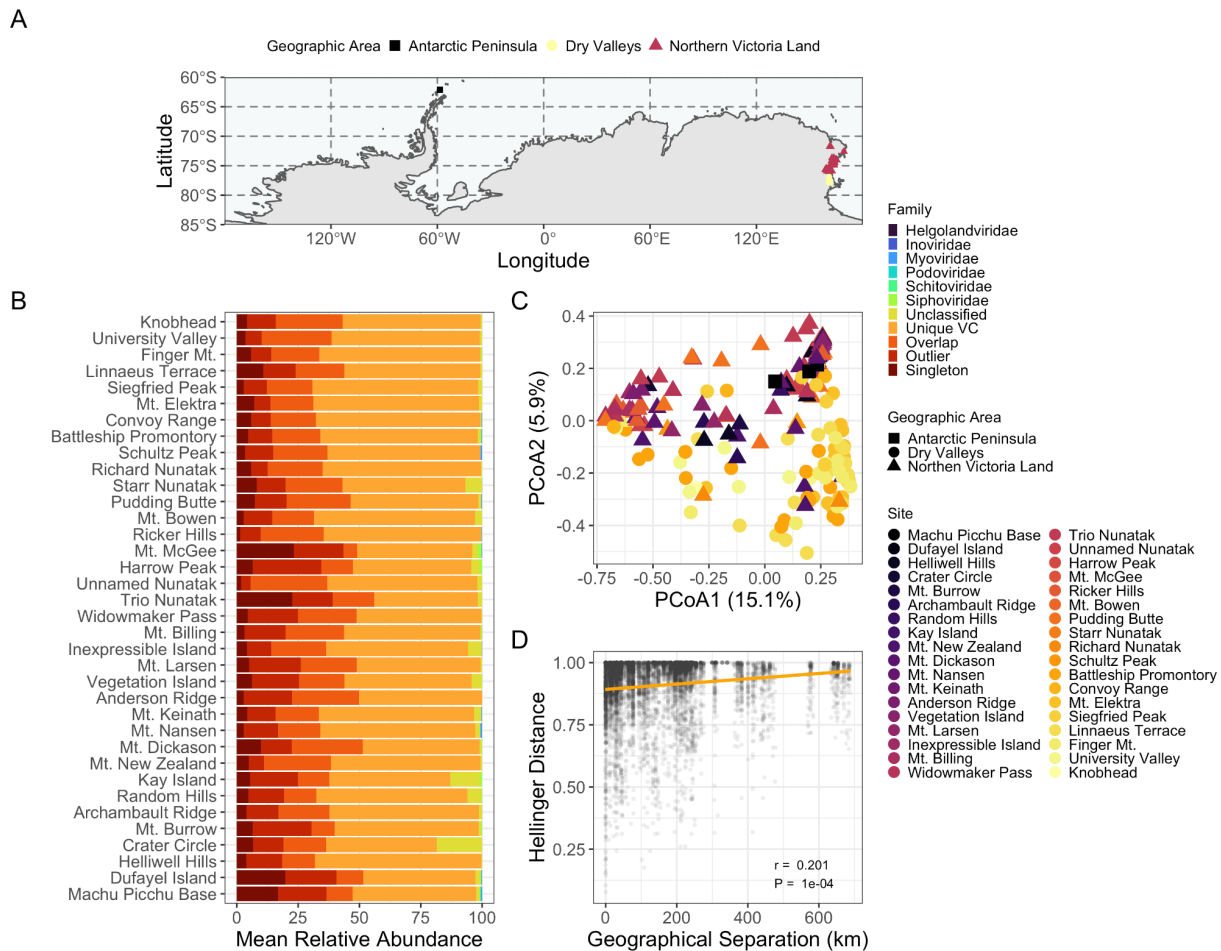

176  
 177 **Figure 2. Spatial structuring of viral communities in Antarctic rocks.** (A) Map showing collection sites  
 178 with shapes and colors representative of the broad geographic area. (B) Stacked bar charts displaying the  
 179 mean relative abundance of phage vOTUs at each site colored by predicted viral families. Sequences that

180 were clustered into VCs with reference data are labeled by their taxonomy, sequences clustered without  
181 reference genomes are labeled “Unique VC”, while the rest are labeled based on their VContact2 status  
182 (i.e., singleton [share few or no genes with other genomes], overlap [share genes with genomes in multiple  
183 VCs], or outlier [share genes, but cannot confidently be placed in a VC]). (C) Principal-coordinate analysis  
184 (PCoA) visualization of Hellinger distances of viral communities. Samples are colored by site, with sites  
185 ordered by latitude, and have shapes based on geographic areas. (D) A scatter plot depicting a significant  
186 positive distance-decay relationship between sandstone viral community beta diversity (Hellinger distance)  
187 and geographical distance (km) between sites.

188

189 This study represents the most exhaustive geographic endeavor to date to capture the viral  
190 genomic diversity across ice-free regions of Antarctica and the first large-scale effort to explore  
191 the virosphere in endolithic communities. This catalog is a comprehensive repository for exploring  
192 the diversity, function, spatial ecology, and host-virus dynamics of this enigmatic continent. We  
193 also unveiled a possible influence of some viruses on carbon, energy and nitrogen metabolisms  
194 under conditions of oligotrophy up to the limit for life sustainability; this may be a key role for the  
195 resilience of these communities. This work is a good model for exploring adaptability of microbial  
196 communities in a scenario of global warming and expanding desertification.

197

## 198 **Methods**

199

### 200 *Study area*

201 191 rocks colonized by endolithic communities were collected in thirty-eight sites in Antarctica  
202 including Antarctic Peninsula ( $n = 3$ ), McMurdo Dry Valleys, Southern Victoria Land ( $n = 80$ ),  
203 and Northern Victoria Land ( $n = 108$ ) during more than 20 years of Italian Antarctic Expeditions.  
204 Different rock typologies (sandstone  $n = 141$ , granite  $n = 43$ , quartz  $n = 5$ , and basalt/dolerite  $n$   
205  $= 2$ ) were sampled. Samples were collected along a latitudinal transect ranging from -62.10008



206 -58.51664 to -77.874 160.739 at different environmental conditions namely sun exposure  
207 (northern sun exposed and southern shady rocks) and an altitudinal transect from sea level to  
208 3,100 m above sea level (a.s.l.) to provide a comprehensive overview of Antarctic endolithic  
209 diversity (Supplementary Table 1). The presence of endolithic colonization was assessed by  
210 direct observation in situ. Rocks were excised using a geologic hammer and sterile chisel, and  
211 rock samples, preserved in sterile plastic bags, transported, and stored at -20 °C in the Culture  
212 Collection of Antarctic fungi of the Mycological Section of the Italian Antarctic National Museum  
213 (MNA-CCFEE), until downstream analysis.

214

#### 215 *Study data*

216 In total, the dataset included 191 metagenomes, of which 100 have been assembled as described  
217 in Albanese et al.<sup>11</sup>. The remaining metagenomes were generated, sequenced, and assembled  
218 as described below. The final metagenomic set represented 149,585,625 metagenomic contigs.

219

#### 220 *DNA extraction, library preparation, and sequencing*

221 Total community DNA was extracted from 1 g of crushed rocks using DNeasy PowerSoil Pro Kit  
222 (Qiagen, German), quality checked by electrophoresis using a 1.5% agarose gel and Nanodrop  
223 spectrophotometer (ThermoFisher, USA) and quantified using the Qubit dsDNA HS Assay Kit (Life  
224 Technologies, USA) according to Coleine et al.<sup>10</sup>. Shotgun metagenomic sequencing paired-end  
225 libraries were constructed and sequenced as 2×150 bp using the Illumina NovaSeq platform  
226 (Illumina Inc, San Diego, CA) at the Edmund Mach Foundation (San Michele all'Adige, Italy) and  
227 at the DOE Joint Genome Institute (JGI).

228

#### 229 *Sequencing reads preparation and assembly*

230 The metashot/mag-illumina v2.0.0 workflow (<https://github.com/metashot/mag-illumina>,  
231 parameters: --metaspades\_k 21,33,55,77,99) was used to perform raw reads quality trimming  
232 and filtering, assembly and contigs binning on the metagenomic samples. In brief, adapter  
233 trimming, contaminant (artifacts and spike-ins) and quality filtering were performed using  
234 BBDuk (BBMap/BBTools v38.79, <https://sourceforge.net/projects/bbmap/>). During the quality  
235 filtering procedure i) raw reads were quality-trimmed to Q6 using the Phred algorithm; ii) reads  
236 that contained 4 or more “N” bases, had an average quality below 10, shorter than 50 bp or under  
237 50% of the original length were removed. Samples were then assembled individually with SPAdes  
238 v3.15.1<sup>44</sup> (parameters –meta -k 21,33,55,77,99).

239

#### 240 *Identification and clustering of viral genomes*

241 Using a workflow similar to Guo et al.<sup>45</sup>, viral sequences were identified in metagenomic  
242 assemblies using VirSorter2 v. 2.2.3<sup>25</sup> using --min-length 5000, --min-score 0.5, and --include-  
243 groups dsDNAphage,NCLDV,RNA,ssDNA,lavidaviridae. CheckV v0.8.1<sup>31</sup> was run on the  
244 VirSorter2 predicted viral sequences using the “end\_to\_end” workflow VirSorter2 was then run  
245 again on the viral sequences from CheckV workflow with the --prep-for-dramv option. DRAM-v v.  
246 1.2.2<sup>40</sup> was then used to “annotate” sequences and then “distill” annotations into predicted  
247 auxiliary metabolic genes (AMGs) for phage.

248

249 Viral sequences were clustered into 95% similarity viral operational taxonomic units (vOTUs)  
250 using CD-HIT v. 4.8.1<sup>26</sup> with the following parameters: -c 0.95 -aS 0.85 -M 0 -d 0. Prodigal v.  
251 2.6.3<sup>46</sup> was used to predict open reading frames in vOTUs using the -p meta option. VContact2  
252 v. 0.9.19 was then run on predicted proteins from phage vOTUs and predicted proteins from the  
253 INPHARED August 2022 viral reference database to generate viral clusters (VCs) based on gene-  
254 sharing networks<sup>27,28</sup>. We assigned taxonomy to phage vOTUs based on VC membership as in

255 Santos-Medellin et al<sup>42</sup>. Predicted viral sequences and 95% similarity vOTUS are archived on  
256 Zenodo<sup>47</sup>.

257

### 258 *Viral host-prediction*

259 Hosts were predicted for the phage sequences identified using (i) a database of complete  
260 genomes from NCBI RefSeq, and (ii) a previously published database of representative  
261 metagenome-assembled genomes (MAGs) from Antarctic endolith samples. To produce (i), we  
262 used “ncbi-genome-download” to download all complete bacterial (n = 25,984) and archaeal (n =  
263 416) genomes, as of April 7, 2022, from NCBI RefSeq<sup>48</sup>. For (ii), we downloaded MAGs from  
264 Zenodo (DOI: 10.5281/zenodo.7313591). We then used NCBI BLAST 2.12.0+ to convert these  
265 two databases into blast databases using “makeblastdb” and used “blastn” to compare vOTUs to  
266 these databases<sup>34</sup>. We filtered the blastn results in R based on existing thresholds<sup>35,36,49</sup>. Briefly,  
267 database matches had to share  $\geq 2000$  bp region with  $\geq 70\%$  sequence identity to the viral  
268 sequence and needed to have a bit score of  $\geq 50$  and minimum e-value of 0.001. Further to ensure  
269 matches did not represent partial or entirely viral contigs when searching against the MAG  
270 database, matches had to cover  $< 50\%$  of the total MAG sequence length. As in Korthari et al.<sup>36</sup>,  
271 only the top five hits matching these thresholds were considered, with host predictions made at  
272 each taxonomic level only if the taxonomy of all hits were in agreement. Discrepancies resulted  
273 in no host prediction for that taxonomic level. We then combined host predictions from both the  
274 RefSeq and MAG databases together; if there were discrepancies between the two databases,  
275 we defaulted to the MAG-based prediction.

276

### 277 *Ecological analysis of vOTUs*

278 We mapped reads from each metagenome to vOTUs using BBMap with a minid=0.90 to quantify  
279 vOTU relative abundance<sup>50</sup>. We then used SAMtools to convert resulting sam files to bam files

280 and genomecov from BEDTools to obtain coverage information for each vOTU across each  
281 metagenome<sup>51,52</sup>. We then used bamM to parse bam files and calculate the trimmed pileup  
282 coverage (tpmean), which we used here in our analysis of viral relative abundance<sup>53</sup>. We  
283 removed vOTUs which displayed < 75% coverage over the length of the viral sequence and viral  
284 sequences < 10 kbp in length prior to downstream analyses in R<sup>54</sup>. Thresholds for analysis of  
285 vOTUs were based on community guidelines for length (i.e.  $\geq 10$  kbp), similarity (i.e.  $\geq 95\%$   
286 similarity), and detection (i.e.  $\geq 75\%$  of the viral genome length covered  $\geq 1x$  by reads at  $\geq 90\%$   
287 average nucleotide identity)<sup>29,30</sup>. To be conservative, we also removed vOTUs with a CheckV  
288 quality score of “not-determined” prior to downstream analysis. The viral abundance (tpmean),  
289 quality, taxonomy and annotation results were imported, analyzed, and visualized in R using many  
290 packages including tidyverse and phyloseq<sup>55,56</sup>. Analysis scripts associated with this study are on  
291 GitHub and archived in Zenodo<sup>57</sup>.

292

293 To compare viral diversity between metagenomes (i.e., beta diversity), we calculated the Hellinger  
294 distance, the Euclidean distance of Hellinger transformed abundance data. We performed  
295 Hellinger transformations using the transform function in the microbiome R package, calculated  
296 the Hellinger distance using the ordinate function in phyloseq, and then visualized these distances  
297 using principal-coordinate analysis (PCoA). We performed permutational multivariate analyses of  
298 variance (PERMANOVAs) with 9,999 permutations to test for significant differences in mean  
299 centroids using the model: Distance ~ Site + Rock type. Models were tested with “by = margins”  
300 and “by = terms” with all sequential combinations. We ran the ordistep and ordiR2step functions  
301 to help assess optimal parameters to include in the model. Since PERMANOVA tests are  
302 sensitive to differences in group dispersion, we also tested for significant differences in mean  
303 dispersions using the betadisper and permutest functions from the vegan package in R with 9,999  
304 permutations.

305

306 To test for correlations between viral community distances (Hellinger distances) and geographic  
307 distances, we first subset the data to exclude metagenomes from the Antarctic Peninsula, and to  
308 account for variation between rock types, subset the data to include only metagenomes  
309 representing sandstone samples. We calculated geographical distances between metagenomes  
310 using the `dism` function in the `geosphere` package in R. We performed Mantel tests in the `vegan`  
311 R package to assess correlations between the community and geographic distances using 9,999  
312 permutations. Mantel tests were repeated with exclusion of community distances when the  
313 geographic distance was zero to assess if patterns persisted in the absence of data from the  
314 same site.

315

## 316 **Data availability**

317 Metagenomes raw data are available under the NCBI accession numbers listed in Supplementary  
318 Table 1. Analysis scripts and intermediate data files associated with this study are on GitHub  
319 ([https://github.com/stajichlab/Antarctic\\_Virus\\_Discovery](https://github.com/stajichlab/Antarctic_Virus_Discovery)) and archived in Zenodo  
320 (<https://doi.org/10.5281/zenodo.7374327>). Fasta files representing the entire catalog of predicted  
321 viral sequences and 95% similarity vOTUS are archived and available on Zenodo  
322 (<https://doi.org/10.5281/zenodo.7245811>).

323

## 324 **Acknowledgements**

325 C.L.E. is supported by the National Science Foundation (NSF) under a NSF Ocean Sciences  
326 Postdoctoral Fellowship (Award No. 2205744). M.S. was supported by the NSF REU The National  
327 Summer Undergraduate Research Project, Award No. 2149582. C.C. is supported by the  
328 European Commission under the Marie Skłodowska-Curie Grant Agreement No. 702057  
329 (DRYLIFE). C.C. and L.S. wish to thank the Italian National Antarctic Research Program for  
330 funding sampling campaigns and research activities in Italy in the frame of PNRA projects. The

331 Italian Antarctic National Museum (MNA) is kindly acknowledged for financial support to the  
332 Mycological Section of the MNA and for providing rock samples used in this study stored in the  
333 Culture Collection of Antarctic fungi (MNA-CCFEE), University of Tuscia, Italy. M.D-B. is  
334 supported by a project from the Spanish Ministry of Science and Innovation (PID2020-115813RA-  
335 I00), and a project of the Fondo Europeo de Desarrollo Regional (FEDER) and the Consejería de  
336 Transformación Económica, Industria, Conocimiento y Universidades of the Junta de Andalucía  
337 (FEDER Andalucía 2014-2020 Objetivo temático '01 – Refuerzo de la investigación, el desarrollo  
338 tecnológico y la innovación') associated with the research project P20\_00879 (ANDABIOMA).  
339 J.E.S. is a CIFAR fellow in the Fungal Kingdom: Threats and Opportunities program. Data  
340 analyses performed at the High-Performance Computing Cluster at the University of California  
341 Riverside in the Institute of Integrative Genome Biology were supported by NSF grant DBI-  
342 1429826 and NIH grant S10-OD016290. Part of this work (proposals  
343 10.46936/10.25585/60000791 and 10.46936/fics.proj.2020.51548/60000213) was conducted by  
344 the U.S. Department of Energy Joint Genome Institute (<https://ror.org/04xm1d337>), a DOE Office  
345 of Science User Facility, supported by the Office of Science of the US Department of Energy  
346 under Contract No. DE-AC02-05CH11231. The funders had no role in study design, data  
347 collection and interpretation, or the decision to submit the work for publication.

348

## 349 **Authors contribution**

350 C.L.E., J.E.S., and C.C. conceived and designed the study. L.S. collected the samples. C.P,  
351 T.G.R. and S.T. oversaw and managed the metagenome sequencing and standard analysis.  
352 C.L.E. performed bioinformatic and statistical analysis with contributions from J.E.S. and M.S..  
353 C.L.E. and C.C. interpreted results with contributions from M.S. and S.R.. C.L.E. and C.C. wrote  
354 the paper with contributions from all co-authors.

355

356

## 357 **References**

- 358 1. Paez-Espino, D. *et al.* Uncovering Earth's virome. *Nature* **536**, 425–430 (2016).
- 359 2. Kristensen, D. M., Mushegian, A. R., Dolja, V. V. & Koonin, E. V. New dimensions of the  
360 virus world discovered through metagenomics. *Trends Microbiol.* **18**, 11–19 (2010).
- 361 3. Jin, M. *et al.* Diversities and potential biogeochemical impacts of mangrove soil viruses.  
362 *Microbiome* **7**, 58 (2019).
- 363 4. Hurwitz, B. L., Westveld, A. H., Brum, J. R. & Sullivan, M. B. Modeling ecological drivers in  
364 marine viral communities using comparative metagenomics and network analyses. *Proc.*  
365 *Natl. Acad. Sci. U. S. A.* **111**, 10714–10719 (2014).
- 366 5. Kristensen, D. M., Mushegian, A. R., Dolja, V. V. & Koonin, E. V. New dimensions of the  
367 virus world discovered through metagenomics. *Trends Microbiol.* **18**, 11–19 (2010).
- 368 6. Jin, M. *et al.* Diversities and potential biogeochemical impacts of mangrove soil viruses.  
369 *Microbiome* **7**, 58 (2019).
- 370 7. Hurwitz, B. L., Westveld, A. H., Brum, J. R. & Sullivan, M. B. Modeling ecological drivers in  
371 marine viral communities using comparative metagenomics and network analyses. *Proc.*  
372 *Natl. Acad. Sci. U. S. A.* **111**, 10714–10719 (2014).
- 373 8. Breitbart, M., Thompson, L., Suttle, C. & Sullivan, M. Exploring the Vast Diversity of Marine  
374 Viruses. *Oceanography* vol. 20 135–139 Preprint at  
375 <https://doi.org/10.5670/oceanog.2007.58> (2007).
- 376 9. Friedmann, E. I. Endolithic Microorganisms in the Antarctic Cold Desert. *Science* **215**,  
377 1045–1053 (1982).
- 378 10. Coleine, C., Biagioli, F., de Vera, J. P., Onofri, S. & Selbmann, L. Endolithic microbial  
379 composition in Helliwell Hills, a newly investigated Mars-like area in Antarctica. *Environ.*  
380 *Microbiol.* **23**, 4002–4016 (2021).
- 381 11. Albanese, D. *et al.* Pre-Cambrian roots of novel Antarctic cryptoendolithic bacterial

- 382 lineages. *Microbiome* **9**, 63 (2021).
- 383 12. Archer, S. D. J. *et al.* Endolithic microbial diversity in sandstone and granite from the  
384 McMurdo Dry Valleys, Antarctica. *Polar Biology* vol. 40 997–1006 Preprint at  
385 <https://doi.org/10.1007/s00300-016-2024-9> (2017).
- 386 13. de la Torre, J. R., Goebel, B. M., Friedmann, E. I. & Pace, N. R. Microbial diversity of  
387 cryptoendolithic communities from the McMurdo Dry Valleys, Antarctica. *Appl. Environ.*  
388 *Microbiol.* **69**, 3858–3867 (2003).
- 389 14. López-Bueno, A. *et al.* High diversity of the viral community from an Antarctic lake. *Science*  
390 **326**, 858–861 (2009).
- 391 15. Prado, T. *et al.* Virome analysis in lakes of the South Shetland Islands, Antarctica - 2020.  
392 *Sci. Total Environ.* **852**, 158537 (2022).
- 393 16. Zavar-Reza, P. *et al.* Diverse small circular single-stranded DNA viruses identified in a  
394 freshwater pond on the McMurdo Ice Shelf (Antarctica). *Infection, Genetics and Evolution*  
395 vol. 26 132–138 Preprint at <https://doi.org/10.1016/j.meegid.2014.05.018> (2014).
- 396 17. Alarcón-Schumacher, T., Guajardo-Leiva, S., Antón, J. & Díez, B. Elucidating Viral  
397 Communities During a Phytoplankton Bloom on the West Antarctic Peninsula. *Front.*  
398 *Microbiol.* **10**, 1014 (2019).
- 399 18. Miranda, J. A., Culley, A. I., Schvarcz, C. R. & Steward, G. F. RNA viruses as major  
400 contributors to Antarctic viroplankton. *Environ. Microbiol.* **18**, 3714–3727 (2016).
- 401 19. Gong, Z. *et al.* Viral Diversity and Its Relationship With Environmental Factors at the  
402 Surface and Deep Sea of Prydz Bay, Antarctica. *Front. Microbiol.* **9**, 2981 (2018).
- 403 20. Zablocki, O. *et al.* High-level diversity of tailed phages, eukaryote-associated viruses, and  
404 virophage-like elements in the metaviromes of antarctic soils. *Appl. Environ. Microbiol.* **80**,  
405 6888–6897 (2014).
- 406 21. Adriaenssens, E. M. *et al.* Environmental drivers of viral community composition in Antarctic  
407 soils identified by viromics. *Microbiome* **5**, 83 (2017).



- 408 22. Zablocki, O. *et al.* Niche-dependent genetic diversity in Antarctic metaviromes.  
409 *Bacteriophage* **4**, e980125 (2014).
- 410 23. Bezuidt, O. K. I. *et al.* Phages Actively Challenge Niche Communities in Antarctic Soils.  
411 *mSystems* **5**, (2020).
- 412 24. Jansson, J. K. & Wu, R. Soil viral diversity, ecology and climate change. *Nat. Rev.*  
413 *Microbiol.* 1–16 (2022) doi:10.1038/s41579-022-00811-z.
- 414 25. Guo, J. *et al.* VirSorter2: a multi-classifier, expert-guided approach to detect diverse DNA  
415 and RNA viruses. *Microbiome* **9**, 37 (2021).
- 416 26. Li, W. & Godzik, A. Cd-hit: a fast program for clustering and comparing large sets of protein  
417 or nucleotide sequences. *Bioinformatics* **22**, 1658–1659 (2006).
- 418 27. Bin Jang, H. *et al.* Taxonomic assignment of uncultivated prokaryotic virus genomes is  
419 enabled by gene-sharing networks. *Nat. Biotechnol.* **37**, 632–639 (2019).
- 420 28. Cook, R. *et al.* Infrastructure for a PHAge REference Database: Identification of Large-  
421 Scale Biases in the Current Collection of Cultured Phage Genomes. *PHAGE* **2**, 214–223  
422 (2021).
- 423 29. Roux, S. *et al.* Minimum Information about an Uncultivated Virus Genome (MIUViG). *Nat.*  
424 *Biotechnol.* **37**, 29–37 (2018).
- 425 30. Roux, S., Emerson, J. B., Eloë-Fadrosch, E. A. & Sullivan, M. B. Benchmarking viromics: an  
426 evaluation of metagenome-enabled estimates of viral community composition and diversity.  
427 *PeerJ* **5**, e3817 (2017).
- 428 31. Nayfach, S. *et al.* CheckV assesses the quality and completeness of metagenome-  
429 assembled viral genomes. *Nat. Biotechnol.* **39**, 578–585 (2021).
- 430 32. Turner, D., Kropinski, A. M. & Adriaenssens, E. M. A Roadmap for Genome-Based Phage  
431 Taxonomy. *Viruses* **13**, (2021).
- 432 33. Selbmann, L. *et al.* Effect of environmental parameters on biodiversity of the fungal  
433 component in lithic Antarctic communities. *Extremophiles* **21**, 1069–1080 (2017).

- 434 34. Camacho, C. *et al.* BLAST+: architecture and applications. *BMC Bioinformatics* **10**, 1–9  
435 (2009).
- 436 35. Edwards, R. A., McNair, K., Faust, K., Raes, J. & Dutilh, B. E. Computational approaches to  
437 predict bacteriophage-host relationships. *FEMS Microbiol. Rev.* **40**, 258–272 (2016).
- 438 36. Kothari, A. *et al.* Ecogenomics of Groundwater Phages Suggests Niche Differentiation  
439 Linked to Specific Environmental Tolerance. *mSystems* e0053721 (2021)  
440 doi:10.1128/mSystems.00537-21.
- 441 37. Jarett, J. K. *et al.* Insights into the dynamics between viruses and their hosts in a hot spring  
442 microbial mat. *The ISME Journal* vol. 14 2527–2541 Preprint at  
443 <https://doi.org/10.1038/s41396-020-0705-4> (2020).
- 444 38. Coleine, C. *et al.* Altitude and fungal diversity influence the structure of Antarctic  
445 cryptoendolithic Bacteria communities. *Environ. Microbiol. Rep.* **11**, 718–726 (2019).
- 446 39. Coleine, C. *et al.* Antarctic Cryptoendolithic Fungal Communities Are Highly Adapted and  
447 Dominated by Lecanoromycetes and Dothideomycetes. *Front. Microbiol.* **9**, 1392 (2018).
- 448 40. Shaffer, M. *et al.* DRAM for distilling microbial metabolism to automate the curation of  
449 microbiome function. *Nucleic Acids Res.* **48**, 8883–8900 (2020).
- 450 41. Li, S. *et al.* A catalog of 48,425 nonredundant viruses from oral metagenomes expands the  
451 horizon of the human oral virome. *iScience* **25**, 104418 (2022).
- 452 42. Santos-Medellin, C. *et al.* Viromes outperform total metagenomes in revealing the  
453 spatiotemporal patterns of agricultural soil viral communities. *ISME J.* **15**, 1956–1970  
454 (2021).
- 455 43. Santos-Medellín, C. *et al.* Spatial turnover of soil viral populations and genotypes overlain  
456 by cohesive responses to moisture in grasslands. *PNAS* **119**, e2209132119 (2022).
- 457 44. Bankevich, A. *et al.* SPAdes: a new genome assembly algorithm and its applications to  
458 single-cell sequencing. *J. Comput. Biol.* **19**, 455–477 (2012).
- 459 45. Guo, J., Vik, D., Pratama, A. A., Roux, S. & Sullivan, M. Viral sequence identification SOP

- 460 with VirSorter2. *protocols.io* <https://www.protocols.io/view/viral-sequence-identification-sop->  
461 [with-virsorter2-btv8nn9w](https://www.protocols.io/view/viral-sequence-identification-sop-with-virsorter2-btv8nn9w) (2021).
- 462 46. Hyatt, D. *et al.* Prodigal: prokaryotic gene recognition and translation initiation site  
463 identification. *BMC Bioinformatics* **11**, 119 (2010).
- 464 47. Ettinger, C., Stajich, J. & Coleine, C. Antarctic Rock Viral Catalog. (2022)  
465 doi:10.5281/zenodo.7245811.
- 466 48. kblin/ncbi-genome-download: Scripts to download genomes from the NCBI FTP servers.  
467 *GitHub* <https://github.com/kblin/ncbi-genome-download>.
- 468 49. Nayfach, S. *et al.* A genomic catalog of Earth's microbiomes. *Nat. Biotechnol.* **39**, 499–509  
469 (2020).
- 470 50. Bushnell, B. BBMap. *SourceForge* <https://sourceforge.net/projects/bbmap/> (2022).
- 471 51. Quinlan, A. R. & Hall, I. M. BEDTools: a flexible suite of utilities for comparing genomic  
472 features. *Bioinformatics* **26**, 841–842 (2010).
- 473 52. Li, H. *et al.* The Sequence Alignment/Map format and SAMtools. *Bioinformatics* **25**, 2078–  
474 2079 (2009).
- 475 53. Ecogenomics/BamM: Metagenomics-focused BAM file manipulation. *GitHub*  
476 <https://github.com/Ecogenomics/BamM>.
- 477 54. R Core Team. *R: A Language and Environment for Statistical Computing*. (2021).
- 478 55. McMurdie, P. J. & Holmes, S. phyloseq: An R Package for Reproducible Interactive  
479 Analysis and Graphics of Microbiome Census Data. *PLoS One* **8**, e61217 (2013).
- 480 56. Wickham, H. *et al.* Welcome to the Tidyverse. *Journal of Open Source Software* **4**, 1686  
481 (2019).
- 482 57. Ettinger, C., Stajich, J. & Coleine, C. *stajichlab/Antarctic\_Virus\_Discovery: v2*. (2022).  
483 doi:10.5281/zenodo.7374327.
- 484
